# Supplementary material
Source: Royal Society of Chemistry journal article supplement (doi:10.1039/d6dt00574h)
Supplement: d6dt00574h1.pdf [file d6dt00574h1.pdf]

## Supporting Information

### **Boosting Multi-Center Luminescence in Cs<sub>7</sub>Cd<sub>3</sub>Br<sub>13</sub> via Synergistic Defect Passivation and Sensitization of Cu(I)**

Jianjie Zhang <sup>a</sup>, XinPeng Dai <sup>a</sup>, Baocheng Luo <sup>a</sup>, Qin Yan <sup>a</sup>, Xing Fan <sup>b</sup>,

Liumei Su\*<sup>a</sup>

a. Guangxi Key Laboratory of Advanced Rare Earth Materials, School of Resources, Environment and Materials, Guangxi University, Nanning, 530004, P.R. China. E-mail address: suliumei2020@gxu.edu.cn.

b. School of Materials and Environment, Guangxi Key Laboratory of Advanced Structural Materials and Carbon Neutralization, Guangxi Colleges and Universities Key Laboratory of Eco-friendly Materials and Ecological Restoration, Guangxi Minzu University, Nanning, 530105, PR China.

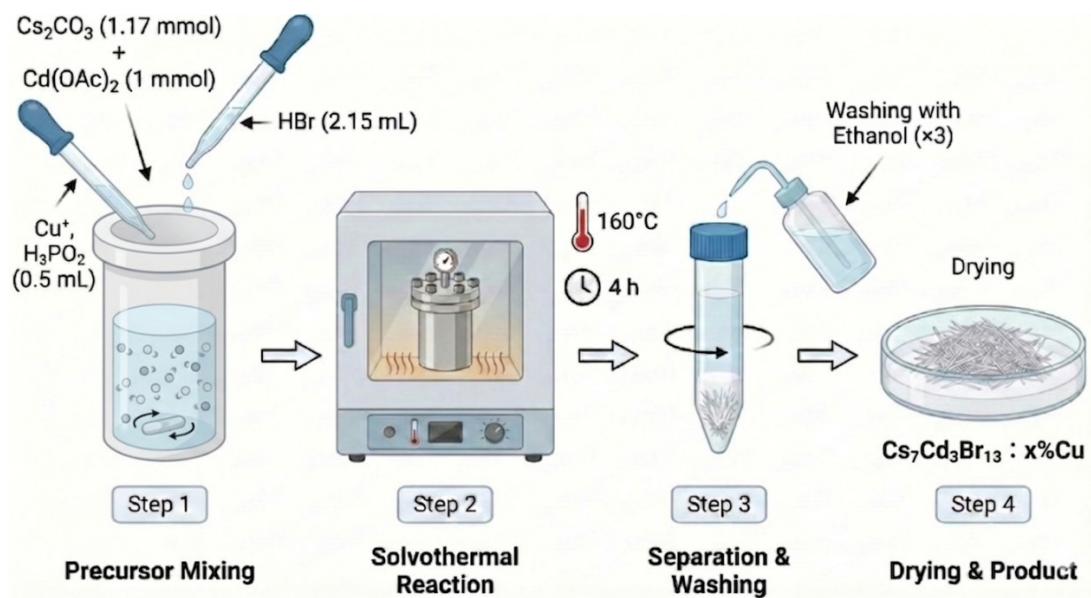

**Figure S1.** Schematic illustration of sample preparation.

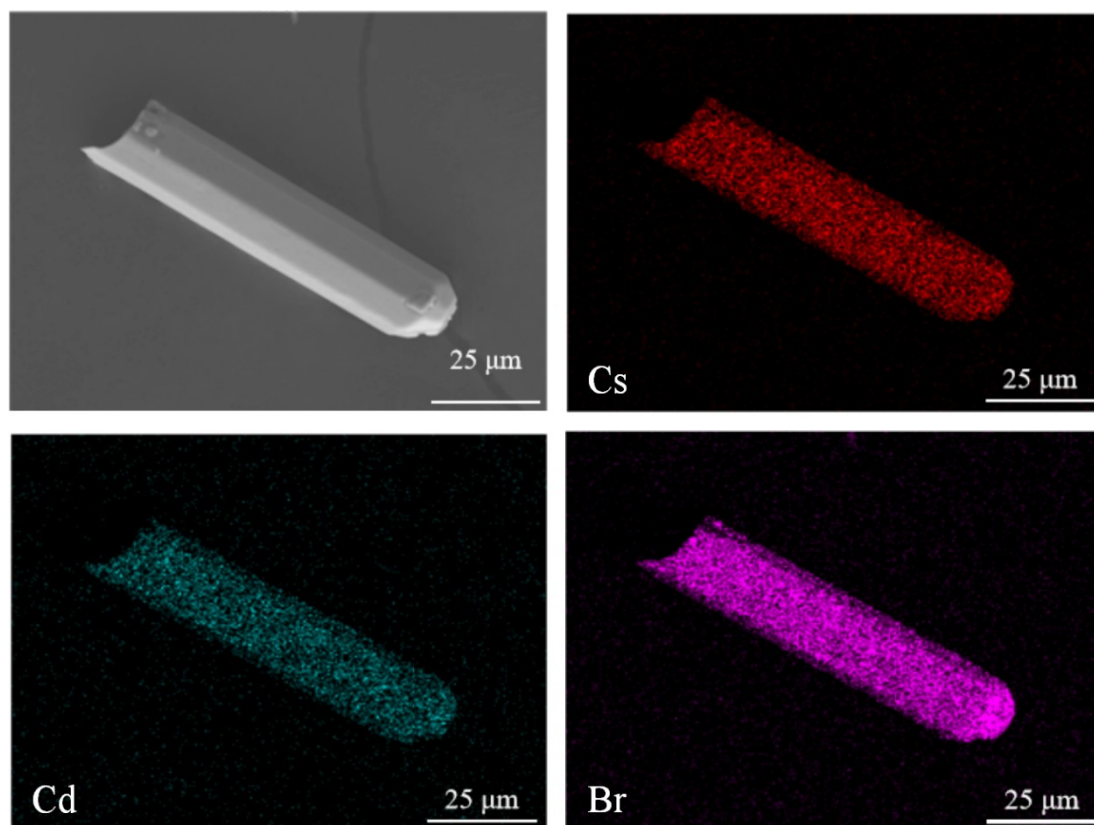

**Figure S2.** The SEM image and EDS-mapping of  $\text{Cs}_7\text{Cd}_3\text{Br}_{13}$ .

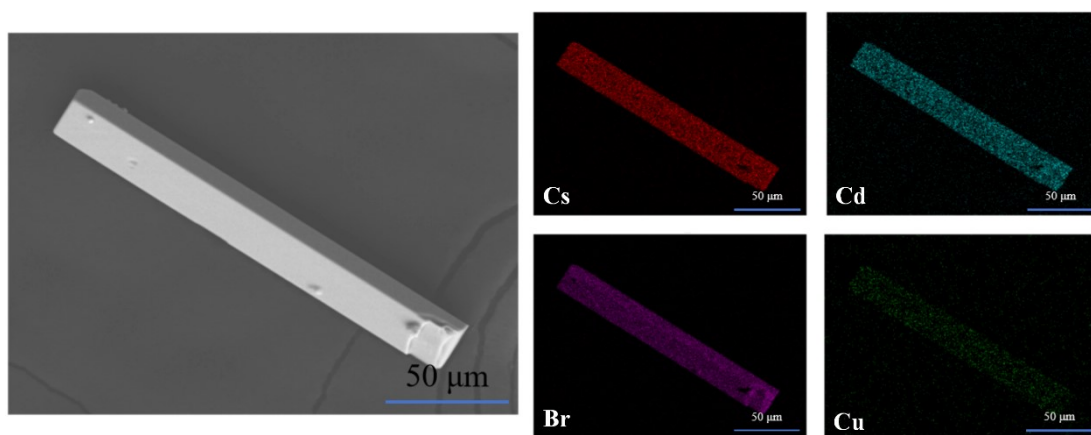

**Figure S3.** The SEM image and EDS-mapping of  $\text{Cs}_7\text{Cd}_3\text{Br}_{13}:\text{0.07\%Cu}^+$ .

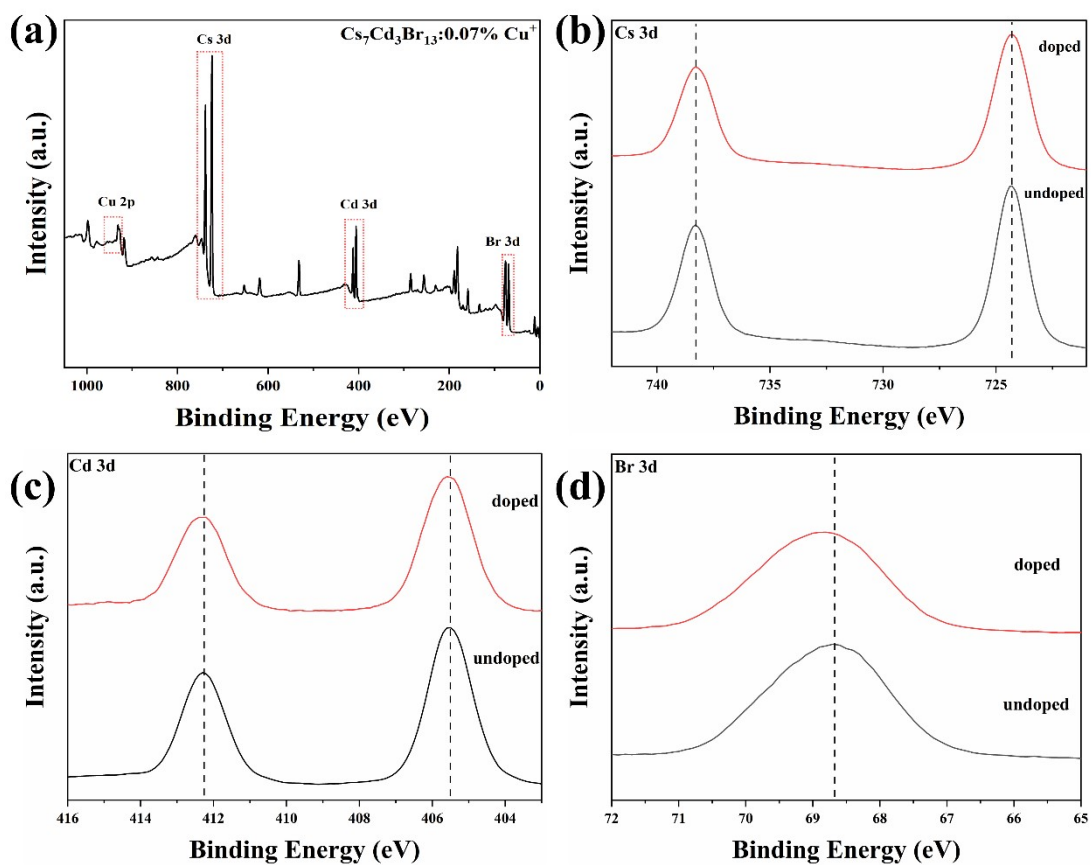

**Figure S4.** (a) XPS spectrum of  $\text{Cs}_7\text{Cd}_3\text{Br}_{13}:\text{0.07\%Cu}$ . High-resolution XPS spectra of (b) Cs, (c) Cd, and (d) Br in  $\text{Cs}_7\text{Cd}_3\text{Br}_{13}$  and  $\text{Cs}_7\text{Cd}_3\text{Br}_{13}:\text{0.07\%Cu}$ .

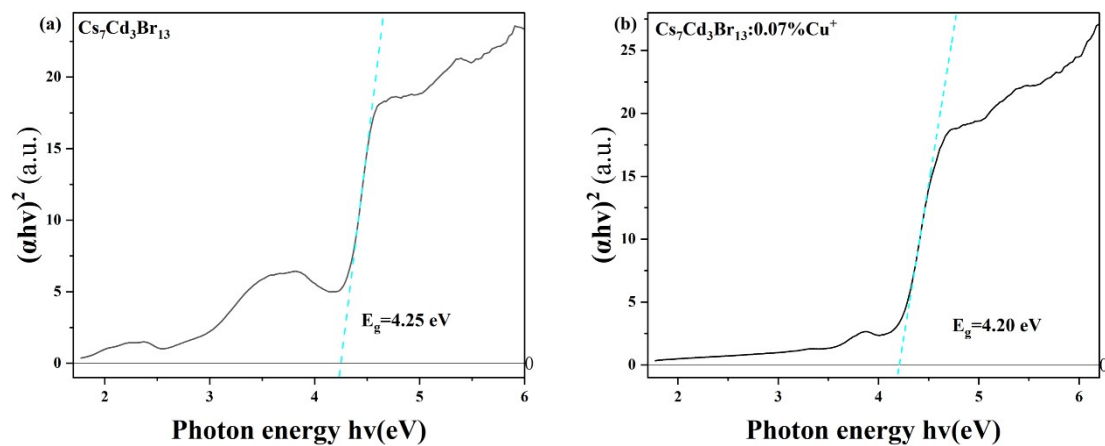

**Figure S5.** Tauc plots fo (a)  $\text{Cs}_7\text{Cd}_3\text{Br}_{13}$  and (b)  $\text{Cs}_7\text{Cd}_3\text{Br}_{13}:0.07\%\text{Cu}^+$ .

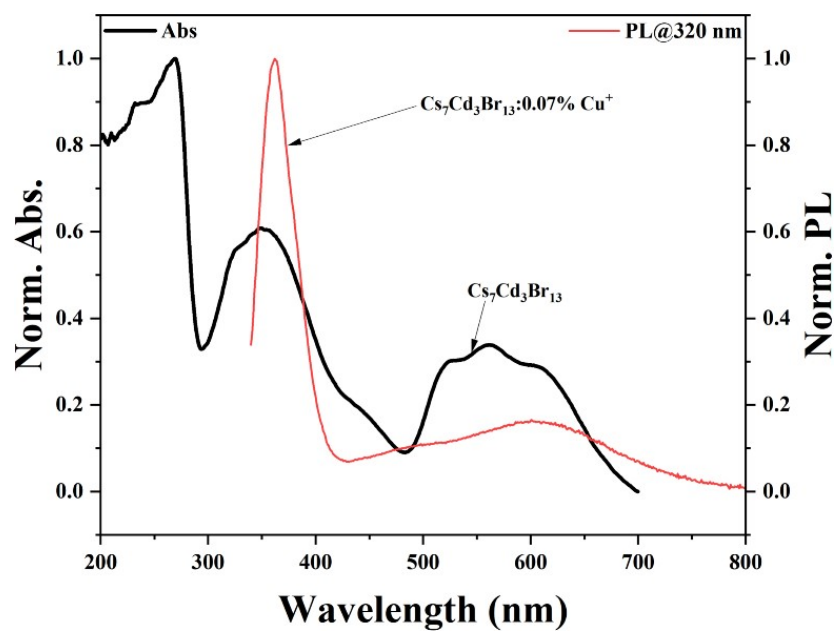

**Figure S6.** Normalized UV-vis absorption (black) and PL spectra (red,  $\lambda_{\text{ex}} = 320$  nm) of  $\text{Cs}_7\text{Cd}_3\text{Br}_{13}$  and  $\text{Cs}_7\text{Cd}_3\text{Br}_{13}:0.07\%\text{Cu}^+$ .

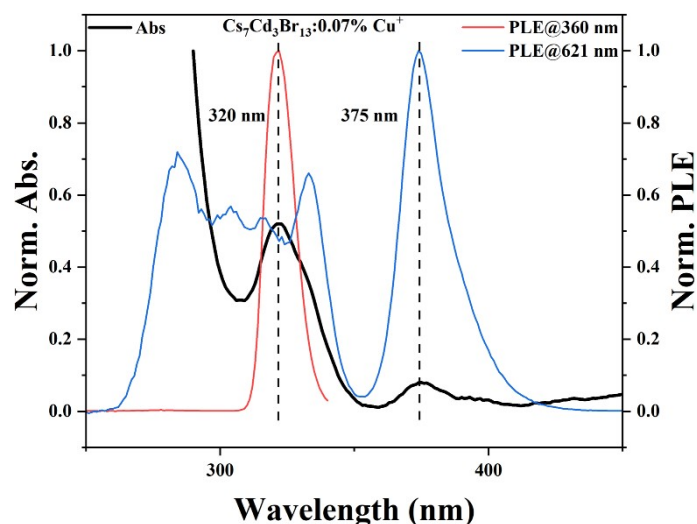

**Figure S7.** Comparison of the magnified absorption-edge tail and the normalized PLE spectra (monitoring at 360 and 621 nm) for  $\text{Cs}_7\text{Cd}_3\text{Br}_{13}:0.07\%\text{Cu}^+$

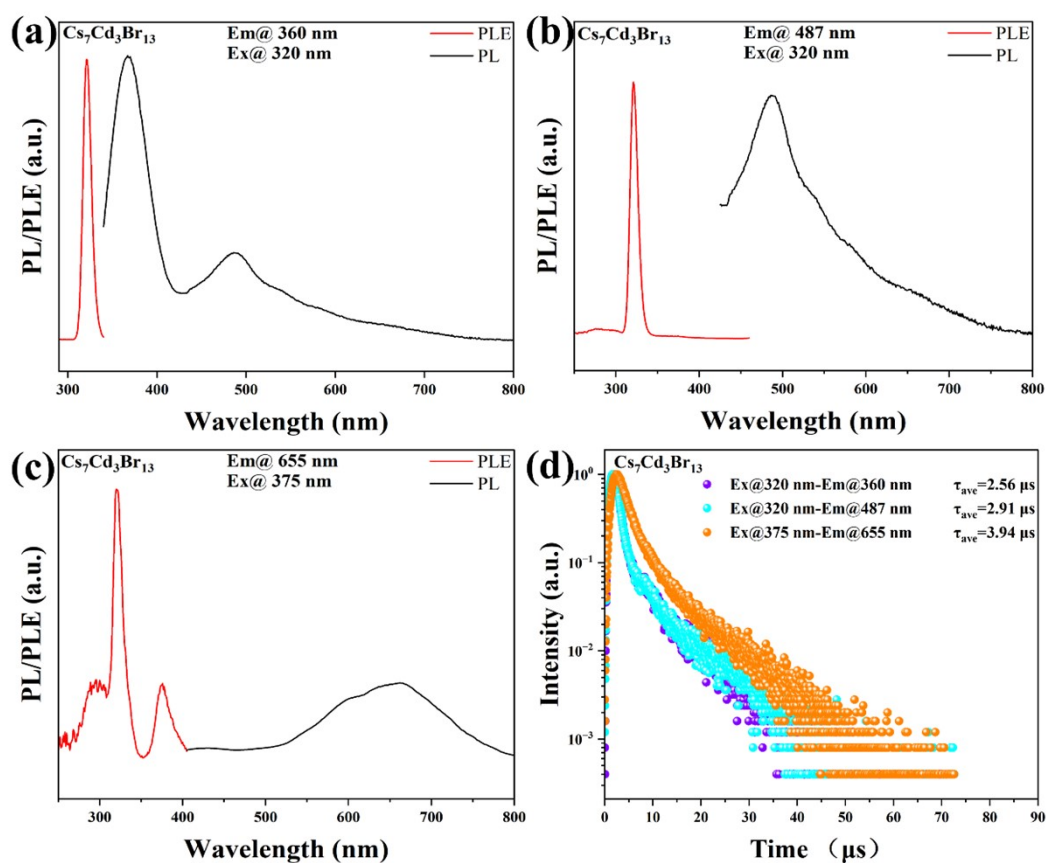

**Figure S8.** PLE and PL spectra of  $\text{Cs}_7\text{Cd}_3\text{Br}_{13}$  (a)  $\text{Em} = 360 \text{ nm}$ ,  $\text{Ex} = 320 \text{ nm}$ , (b)  $\text{Em} = 487 \text{ nm}$ ,  $\text{Ex} = 320 \text{ nm}$ . and (c)  $\text{Em} = 655 \text{ nm}$ ,  $\text{Ex} = 375 \text{ nm}$ . (d) PL decay curves of  $\text{Cs}_7\text{Cd}_3\text{Br}_{13}$ .

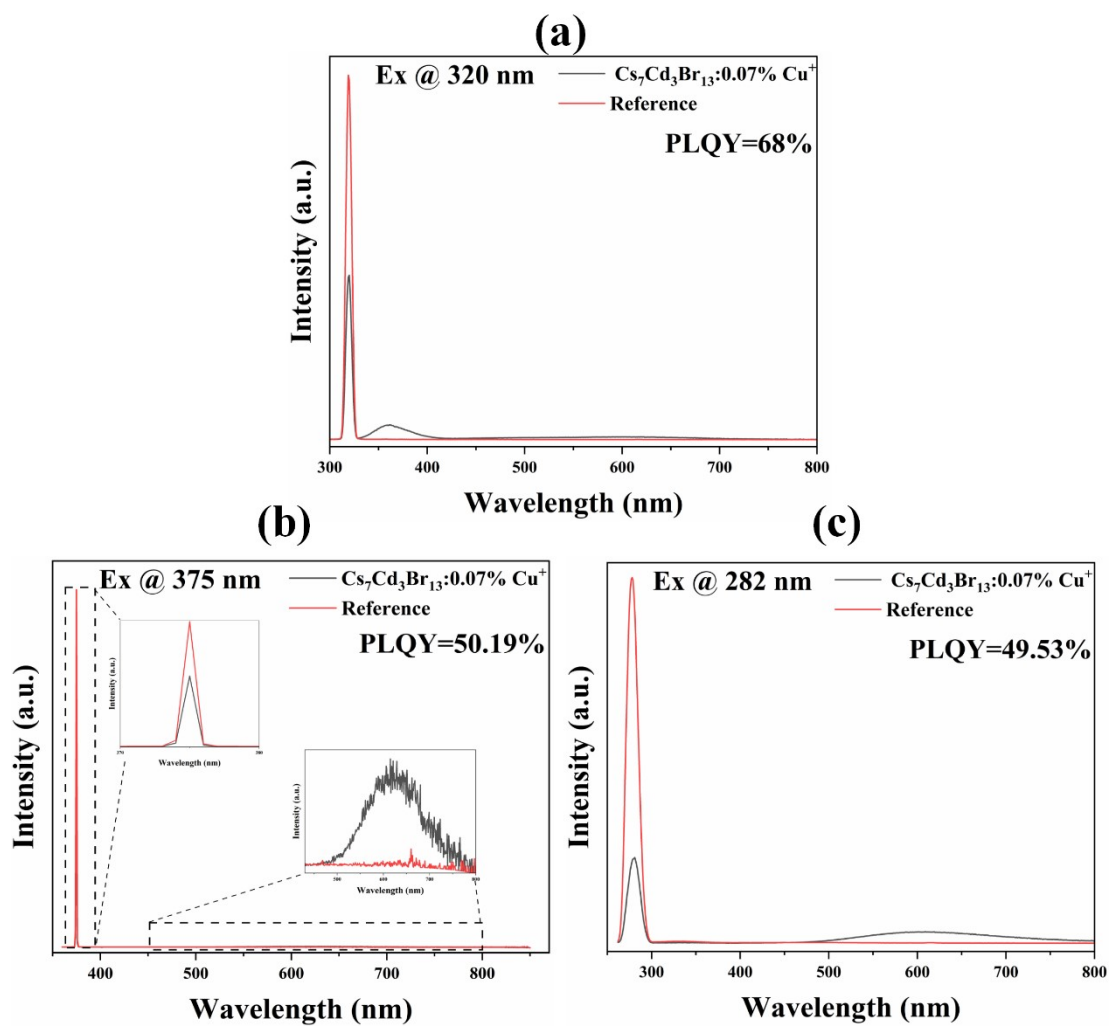

**Figure S9.** Photoluminescence quantum yield measurements of  $\text{Cs}_7\text{Cd}_3\text{Br}_{13}:0.07\% \text{Cu}^+$  under different excitation wavelengths: (a)  $\lambda_{\text{ex}} = 320 \text{ nm}$ , (b)  $\lambda_{\text{ex}} = 375 \text{ nm}$ , and (c)  $\lambda_{\text{ex}} = 282 \text{ nm}$ .

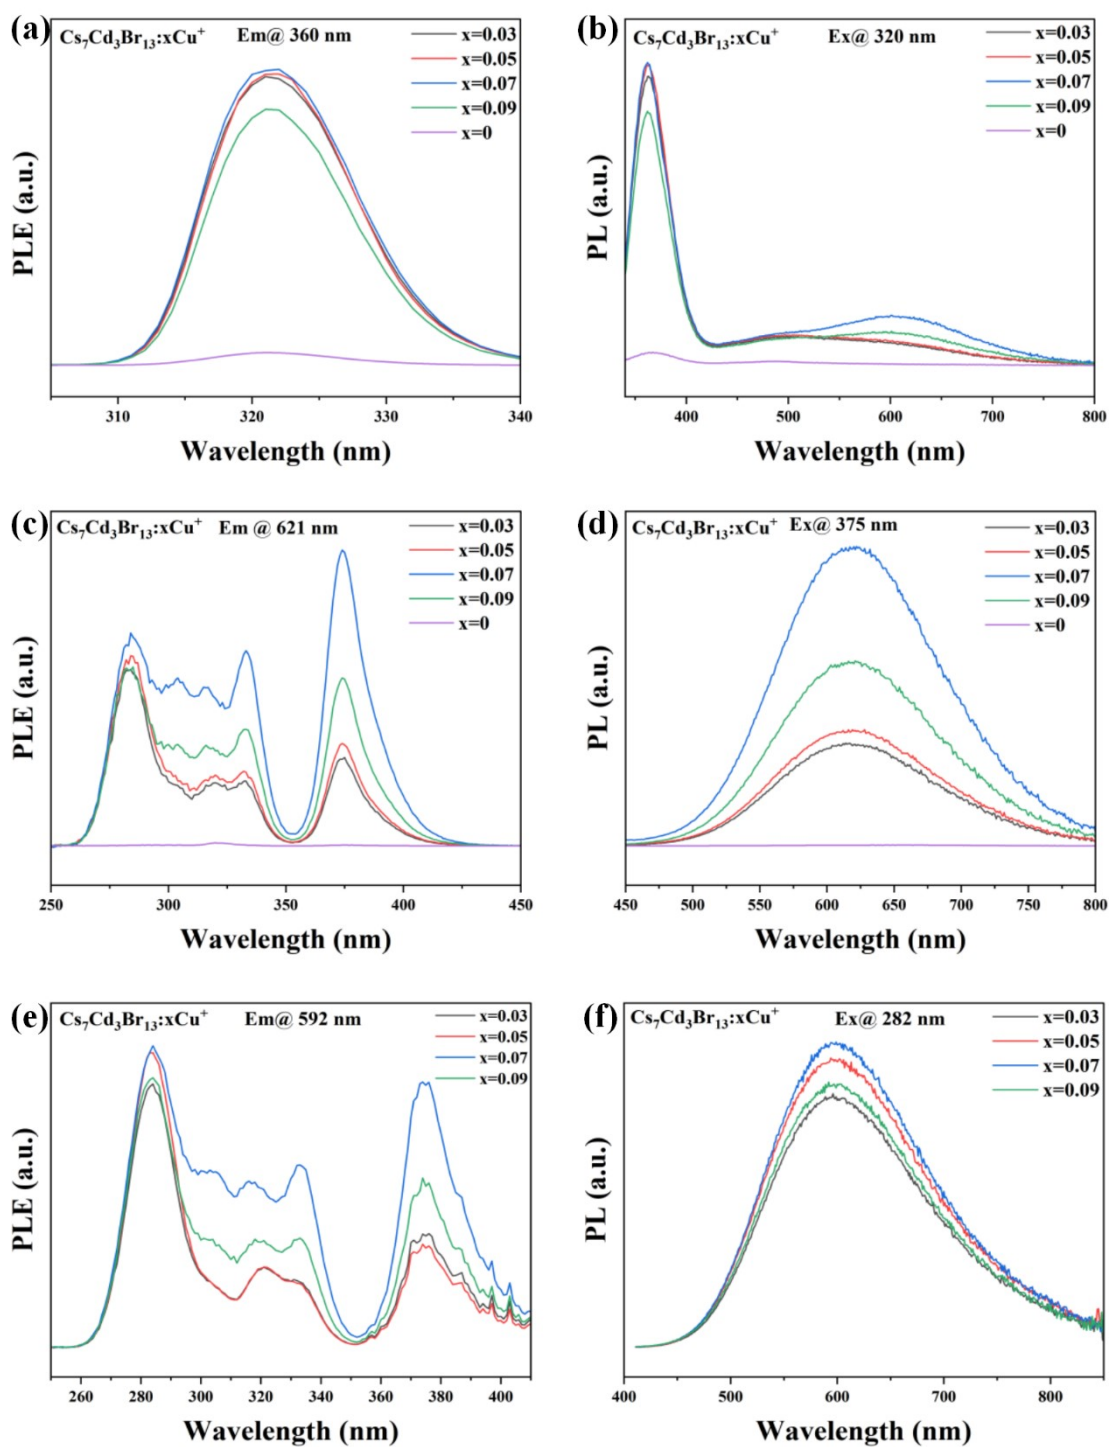

**Figure S10.** The PLE spectra monitored at (a) 360, (c) 621, and (e) 592 nm, as well as the PL spectra excited at (b) 320, (d) 375, and (f) 292 nm for  $\text{Cs}_7\text{Cd}_3\text{Br}_{13}:\text{xCu}^+$ .

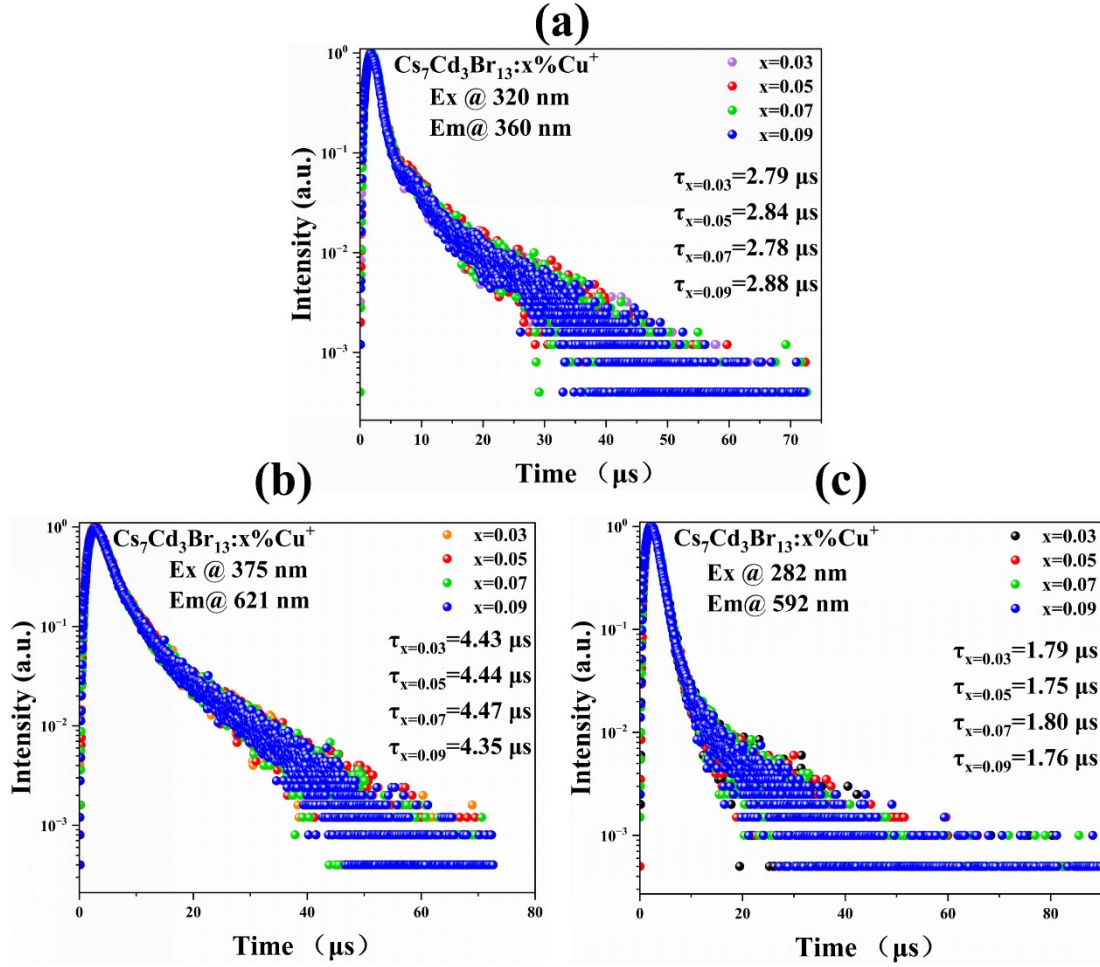

**Figure S11.** PL decay curve of  $\text{Cs}_7\text{Cd}_3\text{Br}_{13}:0.07\%\text{Cu}^+$ . (a)  $\lambda_{\text{ex}} = 320 \text{ nm}$ ; (b)  $\lambda_{\text{ex}} = 375 \text{ nm}$ ; (c)  $\lambda_{\text{ex}} = 282 \text{ nm}$

**Table S1.** Comparison of fluorescence lifetimes before and after doping with  $\text{Cu}^+$  in the sample.

|                             | $\tau_{360 \text{ nm}}$ | $\tau_{621 \text{ nm}}$ |
|-----------------------------|-------------------------|-------------------------|
| Before $\text{Cu}^+$ doping | 2.56 $\mu\text{s}$      | 3.94 $\mu\text{s}$      |
| After $\text{Cu}^+$ doping  | 2.78 $\mu\text{s}$      | 4.47 $\mu\text{s}$      |

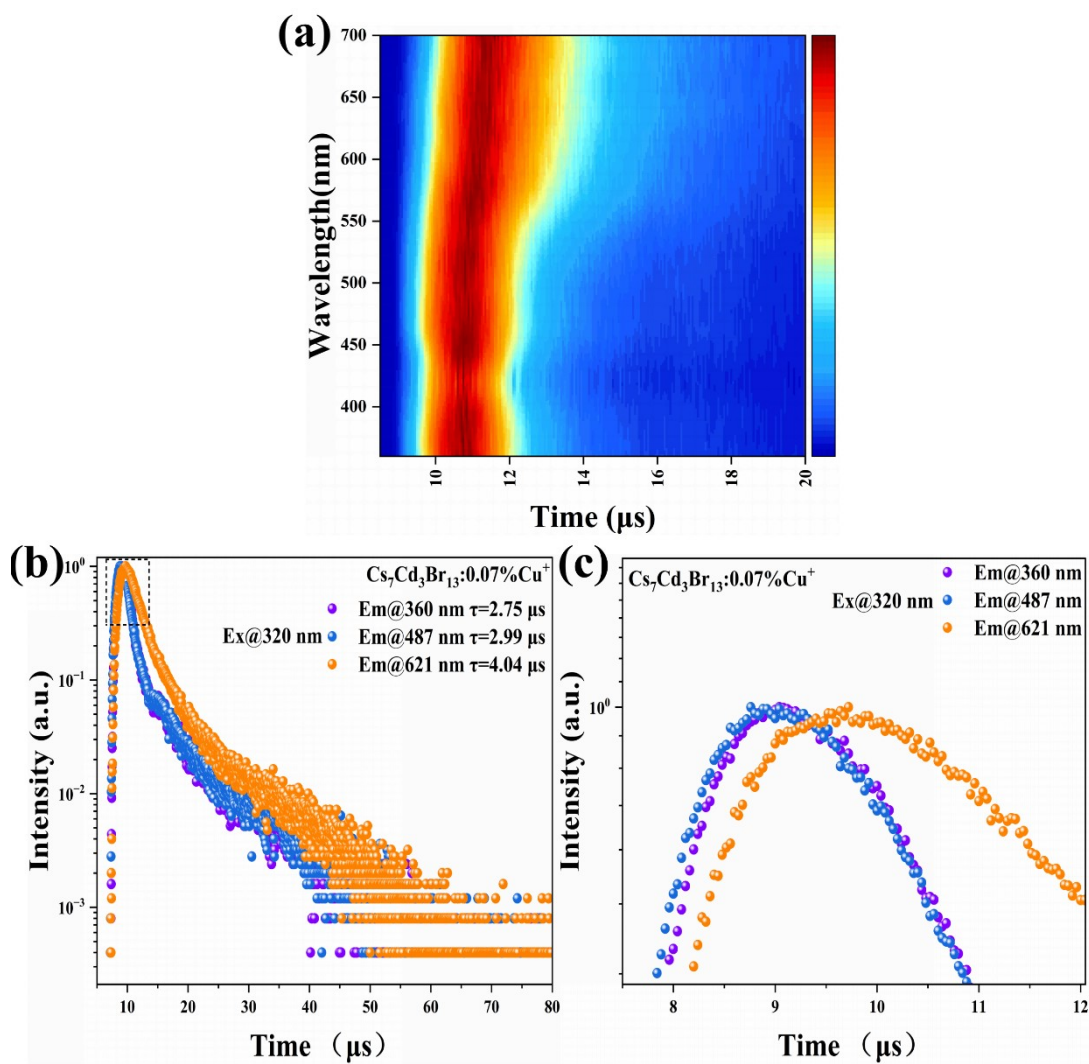

**Figure S12.** Time-resolved photoluminescence of  $\text{Cs}_7\text{Cd}_3\text{Br}_{13}:0.07\%\text{Cu}^+$  under 320 nm excitation: (a) Time-resolved emission spectrum. (b) Comparison of decay curves, and (c) Zoomed-in early-time dynamics at selected emission wavelengths.

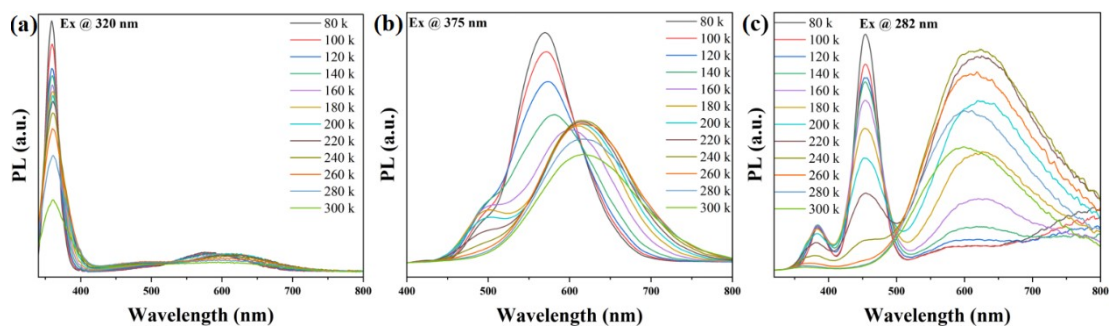

**Figure S13.** Temperature-dependent PL spectra of  $\text{Cs}_7\text{Cd}_3\text{Br}_{13}:0.07\%\text{Cu}^+$  recorded from 80 to 300 K under excitation at (a) 320 nm, (b) 375 nm, and (c) 282 nm.

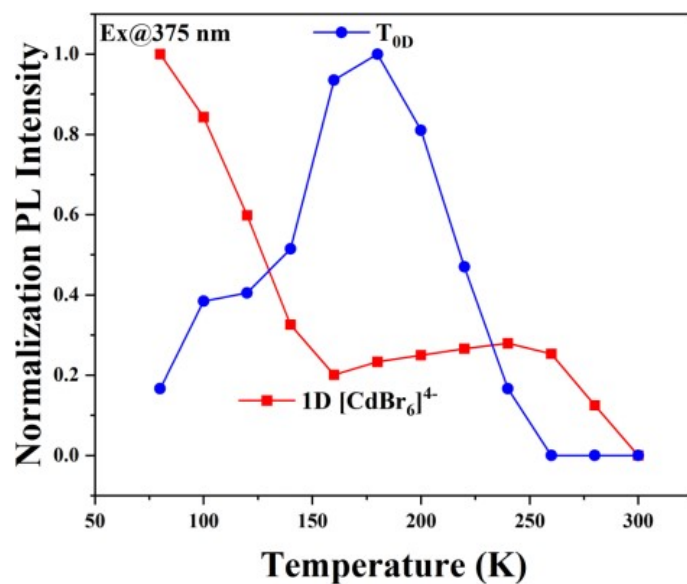

**Figure S14.** Temperature-dependent normalized PL intensities of two emission components under the same excitation ( $\lambda_{\text{ex}} = 375$  nm) assigned to  $T_{0D}$  and 1D  $[\text{CdBr}_6]^{4-}$  units.

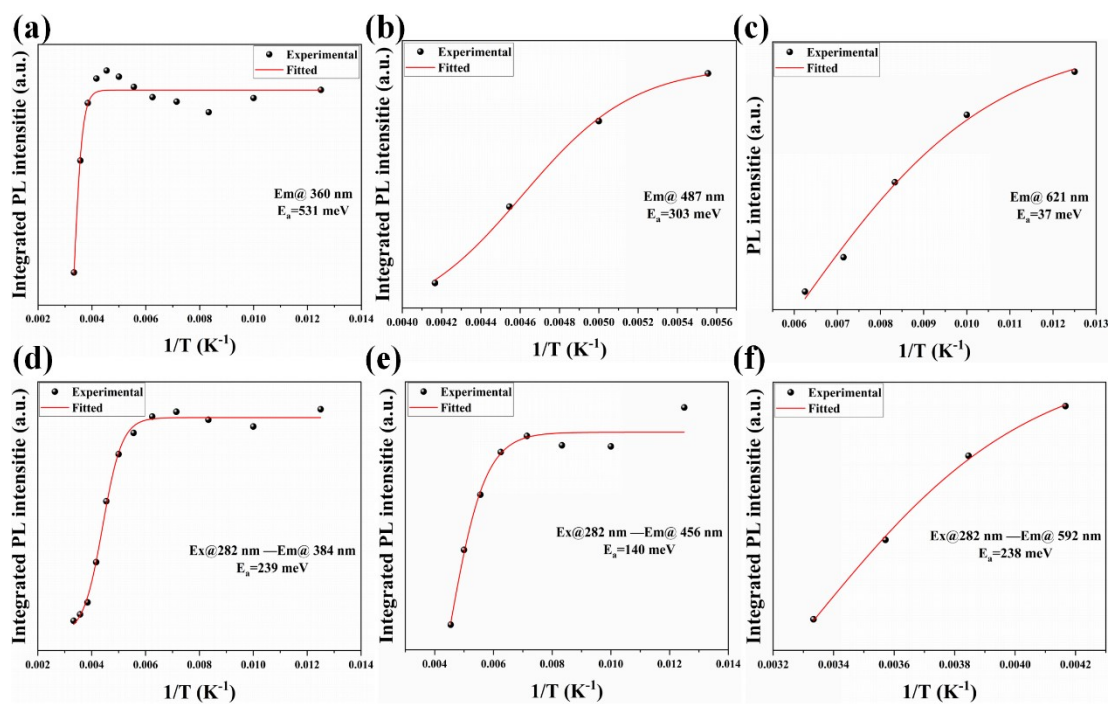

**Figure S15.** Dependence of the integrated PL intensities on  $1/T$  of  $\text{Cs}_7\text{Cd}_3\text{Br}_{13}:0.07\%\text{Cu}^+$

**Table S2.** Comparison of the photoluminescence characteristics of the present Cu<sup>+</sup>-doped Cs<sub>7</sub>Cd<sub>3</sub>Br<sub>13</sub> with those of previously reported related low-dimensional metal halides, including emission wavelength/range, FWHM, PLQY, and representative luminescence behaviors.

| <b>Material</b>                                         | <b>Emission peak / range (nm)</b> | <b>FWHM (nm)</b> | <b>PLQY (%)</b> | <b>Characteristic feature / application</b>      | <b>Ref.</b> |
|---------------------------------------------------------|-----------------------------------|------------------|-----------------|--------------------------------------------------|-------------|
|                                                         | 340–800                           | /                | 68              | Single-component ultrabroadband visible emission |             |
| Cs <sub>7</sub> Cd <sub>3</sub> Br <sub>13</sub> :Cu    | 621                               | 143              | 49.5            | Robust orange emission; excitation-dependent PL  | This work   |
|                                                         | 592                               | 174              | 50.1            | Temperature-dependent multiband emission         |             |
| Cs <sub>7</sub> Cd <sub>3</sub> Br <sub>13</sub> :Sb    | 625                               | 110              | 57.6            | Robust orange emission                           | 1           |
| Cs <sub>7</sub> Cd <sub>3</sub> Br <sub>13</sub> :Mn    | 577                               | 85               | 50              | Robust Yellow emission                           | 2           |
| Cs <sub>7</sub> Cd <sub>3</sub> Br <sub>13</sub> :Mn/Pb | 350–700                           | /                | 98              | white light emitters                             | 3           |
| Cs <sub>7</sub> Cd <sub>3</sub> Br <sub>13</sub> :Mg/Mn | 590                               | 80               | 45.9            | Thermochromic luminescence                       | 4           |
| Cs <sub>7</sub> Cd <sub>3</sub> Br <sub>13</sub> :Pb/Sb | 350–700                           | /                | 93.7            | X-ray imaging, lighting, optical encryption      | 5           |
| Cs <sub>7</sub> Cd <sub>3</sub> Br <sub>13</sub> :Pb/Sb | 380-800                           | /                | 17.2            | excitation-dependent PL                          | 6           |
| Cs <sub>2</sub> AgBr <sub>3</sub> :Cu                   | 506                               | 159              | 21.4            | Cyan emission                                    | 7           |
| (MA) <sub>2</sub> ZnCl <sub>4</sub> :Cu                 | 486                               | 75               | 54.9            | Blue LED                                         | 8           |
| Cs <sub>3</sub> Cd <sub>2</sub> Cl <sub>7</sub> :Cu     | 560                               | 150              | 81.6            | X-ray inspection.                                | 9           |
| Cs <sub>2</sub> ZnCl <sub>4</sub> :Cu                   | 480                               | 71.54            | 35.2            | cyan emission                                    | 10          |

## References

- 1 T. Chang, Q. Wei, Z. Wang, Y. Gao, B. Lian, X. Zhu, S. Cao, J. Zhao, B. Zou and R. Zeng, *J. Phys. Chem. Lett.*, 2022, **13**, 3682–3690.
- 2 C. Yang, B. Ke, Q. Wei, S. Ge, B. He, X. Zhong and B. Zou, *Inorg. Chem.*, 2023, **62**, 3075–3083.
- 3 M. Gao, Y. Pan, C. Peng, Y. Ding, H. Lian, L. Li and J. Lin, *Chem. Mater.*, 2023, **35**, 773–782.
- 4 W. Liao, X. Zhou, J. Jin, Y. Wang and Z. Xia, *Laser & Photonics Reviews*, 2024, **18**, 2400194.
- 5 T. Chang, L. Wang, T. Kou, Q. Wei, P. Li, S. Han, F. Nan, X. Li, D. Huang, R. Zeng, Z. Chen and W. W. Yu, *Carbon Energy*, 2025, **7**, e70016.
- 6 B. Zheng, S. Ge, L. Chen, Y. Wen, K. Huang and B. Zou, *Nanomaterials*, 2025, **15**, 1238.
- 7 R. Fan, X. Zhang, J. Qiao, J. Xu, S. Feng and G. Liu, *Journal of Luminescence*, 2025, **279**, 121048.
- 8 Y. Bai, S. Zhang, N. Luo, B. Zou and R. Zeng, *Nano Res.*, 2024, **17**, 7768–7775.
- 9 T. Ye, Y. Wang, Z. Gao, S. Ge, H. Qin, X. He, J. Wu, R. Liu, M. Zhu, T. Zhou, Z. Pan, J. Hou, M. Wang, Y. He, L. Wang, H. Chen and W. Jiang, *ACS Appl. Opt. Mater.*, 2025, **3**, 898–907.
- 10 J. Chen, X. Zhu, T. Zhao, D. Geng, L. Huan, X. Yang, J. Li and Y. Deng, *ACS Appl. Mater. Interfaces*, 2026, **18**, 16863–16871.
